## ORIGINAL MANUSCRIPT

# An exome-wide analysis of low frequency and rare variants in relation to risk of breast cancer in African American Women: the AMBER Consortium

Stephen A.Haddad<sup>\*</sup>, Edward A.Ruiz-Narváez, Christopher A.Haiman<sup>1</sup>,  
Lara E.Sucheston-Campbell<sup>2</sup>, Jeannette T.Bensen<sup>3</sup>, Qianqian Zhu<sup>4</sup>,  
Song Liu<sup>4</sup>, Song Yao<sup>2</sup>, Elisa V.Bandera<sup>5</sup>, Lynn Rosenberg, Andrew F.Olshan<sup>3</sup>,  
Christine B.Ambrosone<sup>2</sup>, Julie R.Palmer and Kathryn L.Lunetta<sup>6</sup>

Slope Epidemiology Center at Boston University, Boston, MA 02215, USA, <sup>1</sup>Department of Preventive Medicine, Keck School of Medicine, University of Southern California/Norris Comprehensive Cancer Center, Los Angeles, CA 90033, USA, <sup>2</sup>Department of Cancer Prevention and Control, Roswell Park Cancer Institute, Buffalo, NY 14263, USA, <sup>3</sup>Department of Epidemiology, Gillings School of Global Public Health, University of North Carolina at Chapel Hill, Chapel Hill, NC 27599, USA, <sup>4</sup>Department of Biostatistics and Bioinformatics, Roswell Park Cancer Institute, Buffalo, NY 14263, USA, <sup>5</sup>Cancer Prevention and Control, Rutgers Cancer Institute of New Jersey, New Brunswick, NJ 08903, USA and <sup>6</sup>Department of Biostatistics, Boston University School of Public Health, Boston, MA 02118, USA

<sup>\*</sup>To whom correspondence should be addressed. Tel: +1 617 206 6177; Fax: +1 617 738 5119; Email: [sahaddad@bu.edu](mailto:sahaddad@bu.edu)

## Abstract

A large percentage of breast cancer heritability remains unaccounted for, and most of the known susceptibility loci have been established in European and Asian populations. Rare variants may contribute to the unexplained heritability of this disease, including in women of African ancestry (AA). We conducted an exome-wide analysis of rare variants in relation to risk of overall and subtype-specific breast cancer in the African American Breast Cancer Epidemiology and Risk (AMBER) Consortium, which includes data from four large studies of AA women. Genotyping on the Illumina Human Exome Beadchip yielded data for 170 812 SNPs and 8287 subjects: 3629 cases (1093 estrogen receptor negative (ER<sup>-</sup>), 1968 ER<sup>+</sup>, 568 ER unknown) and 4658 controls, the largest exome chip study to date for AA breast cancer. Pooled gene-based association analyses were performed using the unified optimal sequence kernel association test (SKAT-O) for variants with minor allele frequency (MAF)  $\leq 5\%$ . In addition, each variant with MAF  $>0.5\%$  was tested for association using logistic regression. There were no significant associations with overall breast cancer. However, a novel gene, FBXL22 ( $P = 8.2 \times 10^{-6}$ ), and a gene previously identified in GWAS of European ancestry populations, PDE4D ( $P = 1.2 \times 10^{-6}$ ), were significantly associated with ER<sup>-</sup> breast cancer after correction for multiple testing. Cases with the associated rare variants were also negative for progesterone and human epidermal growth factor receptors—thus, triple-negative cancer. Replication is required to confirm these gene-level associations, which are based on very small counts at extremely rare SNPs.

## Introduction

Genome-wide association studies (GWAS) have identified more than 90 genetic loci associated with breast cancer (1,2). Per-allele odds ratios have been modest (most  $<1.2$ ), as is typical for GWAS findings. These low-penetrance loci, together with

previously discovered high- and moderate-penetrance genes, fail to explain the majority of the genetic contribution to the disease (1–4). Most GWAS-based associations have been established in European or Asian populations, and the majority of

Received: April 12, 2016; Revised: May 19, 2016; Accepted: May 30, 2016

© The Author 2016. Published by Oxford University Press. All rights reserved. For Permissions, please email: [journals.permissions@oup.com](mailto:journals.permissions@oup.com).

## Abbreviations

|      |                                 |
|------|---------------------------------|
| AA   | African ancestry                |
| GWAS | Genome-wide association studies |
| MAF  | minor allele frequency          |

these associations have failed to reach statistical significance in studies of African ancestry (AA) women (5–15). While larger AA sample sizes and an accounting for differences in linkage disequilibrium across ethnicities would likely result in more successful replications, the European-discovered risk variants may also explain less of the genetic contribution to breast cancer in AA women.

While some of the unexplained breast cancer heritability in AA women is surely due to unidentified common susceptibility SNPs in this population, another portion may be explained by less common (1–5%) and rare variants (< 1%). These lower frequency variants represent a large proportion of all human genetic variation but are poorly captured by most GWAS arrays (16). There are a growing number of examples of rare variants associated with complex disease, with findings for autism, schizophrenia, inflammatory bowel disease and diabetes (17). In addition to the already established high- and moderate-penetrance genes for breast cancer (3,4,18), novel low frequency risk variants for cancers including prostate (19) and ovarian (20,21) have also been reported. Still, it remains unclear how much rare variants contribute to the heritability of breast cancer and other complex diseases.

In recent years, the development of exome-wide arrays has allowed for the relatively inexpensive assessment of known rare exonic variants. Current exome arrays include >200 000 coding variants and were developed on the basis of whole exome sequencing data from ~12 000 individuals. Most of those sequenced were of European ancestry, but a small number of AAs and other ethnicities were included as well (16,22).

A case-control study nested in the Multiethnic Cohort (MEC) used the Illumina exome chip to investigate the role of rare exonic variation in the etiology of breast cancer (16). Single SNP analyses were conducted, as well as gene-based testing of the burden of rare alleles. Only one significant association was found, for splice-site SNP rs145889899 in the *LDLRAD1* gene. This variant was only seen in AAs (with a frequency of 0.65% in AA controls) and had an odds ratio of 3.74. While no additional findings were significant, there was low power to detect genotype relative risks  $\leq 2$  in the AA participants due to the modest number of available AA cases ( $N = 591$ ).

The present study combined the MEC exome chip data with exome chip data from three additional studies of breast cancer in AA women, forming the African American Breast Cancer Epidemiology and Risk (AMBER) Consortium, the largest exome wide analysis sample to date for AA breast cancer (3629 cases and 4658 controls). We primarily used gene-based methods for association analysis, given the relatively low power and high multiple testing burden for single SNP analyses of rare variants (22,23). Gene-based testing has the potential to increase power when multiple SNPs in a given gene are associated (22).

## Materials and methods

### Study population

This investigation was conducted using data from the AMBER Consortium, a collaboration of four of the largest studies of breast cancer in AA women. The AMBER Consortium has been described previously (24), and prior reports have detailed the individual studies: the Carolina Breast Cancer

Study (CBCS) (25), the Women's Circle of Health Study (WCHS) (26,27), the Black Women's Health Study (BWHS) (28), and the Multiethnic Cohort (MEC) (29). Institutional Review Board approval was obtained for each study, and all participants provided written informed consent.

Briefly, the CBCS is a North Carolina population-based case-control study of women aged 20–74 years that began in 1993. The North Carolina Central Cancer Registry's rapid case ascertainment system was used for case identification, and controls were selected through 2001 using Division of Motor Vehicles lists (age < 65 years) and Health Care Financing Administration lists (age  $\geq 65$ ). Interviewers collected questionnaire data and samples for DNA analysis in home visits.

The WCHS is a multi-site case-control study in New York City (NYC) (2002–2008) and New Jersey (NJ) (2006–present). Hospital-based ascertainment of cases aged 20–75 years was used in NYC, and controls were selected through random digit dialing. Cases in NJ are identified by the NJ State Cancer Registry using rapid case ascertainment, and controls are identified through random digit dialing and community-based efforts (27). Risk factor data and samples for DNA analysis are obtained during in-person interviews.

The BWHS is a prospective cohort study of 59 000 AA women from across the United States who enrolled by completing a postal health questionnaire in 1995. The age range at baseline was 21–69 years. Biennial follow-up questionnaires identify new cases of breast cancer, and these cases are confirmed by medical records or from state cancer registry data and the National Death Index. Nearly 27 000 BWHS participants provided saliva samples for DNA analysis.

The MEC is a prospective cohort study that began in 1993 with the enrollment of men and women aged 45–75 years from a range of ethnic groups in Hawaii and California. Data are collected by mailed questionnaire at 5-year intervals, and breast cancer cases are confirmed through the Hawaii and California state cancer registries and the National Death Index. Blood samples were collected from study participants for DNA analysis.

Eligible cases for the present analyses were AA women with incident invasive breast cancer or ductal carcinoma in situ (DCIS). For BWHS and MEC, controls were chosen from among women without breast cancer, and were frequency matched to cases on geographical region, sex, race and 5-year age group. ER status for cases was determined using pathology data from hospital records or cancer registry records.

### Genotyping and QC

Genotyping of DNA from participants in the BWHS, CBCS and WCHS was performed by the Center for Inherited Disease Research (CIDR) using the Illumina Human Exome Beadchip v1.1. This array includes >200 000 coding variants, as well as tag SNPs for GWAS hits, a grid of common variants, and ancestry informative markers (AIMs). A description of the exome chip design is available from [http://genome.sph.umich.edu/wiki/Exome\\_Chip\\_Design](http://genome.sph.umich.edu/wiki/Exome_Chip_Design). CIDR used the GenTrain Version 1.0 calling algorithm in GenomeStudio version 2011.1, Genotyping Module 1.9.4. Manual review was conducted for all Y, XY pseudoautosomal and mitochondrial SNPs. Autosomal and X chromosome SNPs were also manually reviewed if a rare heterozygous cluster may have been missed by the GenCall algorithm and if the zCall algorithm (30) identified four or more possible new heterozygous points.

A total of 246 519 SNPs were genotyped, and 231 705 SNPs remained after excluding variants that failed technical filters imposed by CIDR, or QC filters recommended by the University of Washington. Briefly, genotypes with a GenCall (GC) score <0.15 were classified as missing, and SNPs were removed if they had poor cluster properties (ex. cluster separation <0.2 or <0.3 depending on allele frequency), call rates <0.98, Hardy-Weinberg Equilibrium  $P < 1 \times 10^{-4}$ , >1 Mendelian error in trios from HapMap (31) or >2 discordant calls in duplicate samples. Mitochondrial and Y chromosome SNPs were also removed. Genotypes were attempted for 6936 participants from the BWHS, CBCS and WCHS, and were completed with call rate >98% for 6828 participants, which included 3130 cases (963 estrogen receptor negative (ER–), 1674 ER+, 493 ER unknown) and 3698 controls.

Genetic data from 499 cases (130 ER–, 294 ER+, 75 ER unknown) and 960 controls in the MEC were available from genotyping on a previous version of the exome chip (16) which contained >99% of the high quality variants from v1.1. Genotypes from MEC were combined with the data from the

other AMBER studies into a data set containing 245 571 SNPs. Greater than 66 000 SNPs were monomorphic in the combined set and were omitted from analyses, as were SNPs with high quality data from only one of the two exome chips and SNPs with any discordant genotypes across the two chips for 30 MEC participants who were included on both. The final data set for analysis included 170 812 SNPs and 8287 participants: 3629 cases (1093 ER-, 1968 ER+, 568 ER unknown) and 4658 controls.

We used the CHARGE (Cohorts for Heart and Aging Research in Genomic Epidemiology) Consortium's annotation of exome chip variants (version 6, 11/7/14) downloaded from <http://www.chargeconsortium.com/main/exomechip> (32). This annotation was performed with dbNSFP version 2.6 (33,34).

We used the smartpca program in the EIGENSOFT package (35) to conduct a principal components analysis (PCA) based on ~42 000 common SNPs, most of which were custom content additions to the exome chip for use in other AMBER projects. In a separate analysis, PLINK version 1.07 (36) was used to estimate identity by descent in participant pairs, and identified 130 sets of relatives across and within the individual studies, consisting of 270 individuals. These 270 individuals were flagged, as were 35 outlying individuals from the PCA, so that sensitivity analyses could be performed. Genotype principal components were tested for association with case status after controlling for the study covariates: study, DNA source (blood, saliva[Oragene], saliva[mouthwash]), and the matching variables. While no principal components were strongly associated in the multivariable model, we included terms for principal components with  $P < 0.1$  in our analyses.

### Association analysis

Gene-based association analyses for overall, ER+, and ER- breast cancer were conducted using the unified optimal sequence kernel association test (SKAT-O) (37), as implemented in the R package seqMeta (38). As a linear combination of the burden and SKAT (39) tests, SKAT-O achieves robust power whether a given gene has a high proportion of causal variants exerting effects in the same direction, or instead has many noncausal variants or variants exerting effects in opposite directions (22). We used the default SKAT-O option in the seqMeta package that considers rho = 1 (burden) and rho = 0 (SKAT) tests and selects the optimal of the two tests. Depending on which test is chosen, SKAT-O models the phenotype versus a weighted aggregation of either the variants (burden test) or the variant score test statistics (SKAT) to produce a gene-level  $P$  value that indicates the degree of enrichment of rare variant associations in that gene (37). We included variants with minor allele frequency (MAF)  $\leq 5\%$ , and used the beta distribution weights proposed by Wu et al. (39), which upweight rarer variants, for both tests. We used a Bonferroni correction based on the number of genes evaluated to assess the significance of the gene-based test results.

We performed separate gene-based analyses for three successively less stringent sets of exonic variants: (1) 'NS\_strict' variants (based on Purcell et al. (40)): stopgain, stoploss, frameshift or predicted damaging by all five of the following algorithms: SIFT (41), mutationTaster category [A or D] (42), LRT (43), PolyPhen\_HDIV (44) and PolyPhen\_HVAR (44), (2) 'NS\_broad' variants (Purcell et al. (40)): 'NS\_strict' variants plus those variants that are predicted damaging by at least one of the five algorithms and (3) All nonsynonymous variants ('NS\_all'): 'NS\_broad' variants plus all other missense and splice variants. Testing of these three sets of variants gave us more flexibility to find the best set of SNPs for gene-based analysis (ideally a set including most or all truly associated SNPs, but few, if any, unassociated SNPs).

Single SNP association analyses were conducted using logistic regression as implemented in PLINK version 1.07. These analyses were restricted to variants with MAF  $> 0.5\%$  in order to avoid performing a large number of underpowered tests. We used a Bonferroni adjustment for the effective number of independent tests, applying the method of Gao et al. (45), to assess the significance of the single SNP results.

Both gene-based and single SNP analyses were adjusted for study, age, geographic region, DNA source and genotype principal components 5, 6 and 8 in a pooled analysis that combined individual level data across the four studies in AMBER. This approach was preferred over meta-analysis given prior evidence that pooled analysis is more powerful for gene-based testing of rare variants under conditions where pooling is appropriate (46).

## Results

The present analyses included 3629 breast cancer cases (1093 ER-, 1968 ER+, 568 ER unknown) and 4658 controls. Table 1 shows the distribution of ER subtypes and age at diagnosis for the cases by study site.

There were 184 100 annotation records for the 170 812 SNPs that passed QC filters: some SNPs mapped to more than one gene, and these multiple mappings were maintained for the gene-based analyses we performed. More than 80% of the SNP records were annotated as nonsynonymous, including missense, stopgain, stoploss, frameshift and splicing variants (see Supplementary Table 1, available at Carcinogenesis Online, for the full distribution of roles for the final SNP set). Over 80% of the SNPs had MAF  $< 5\%$  in AMBER, over 70% had MAF  $< 1\%$ , and nearly half of the SNPs had MAF  $< 0.1\%$ . QQ plots for the gene-based and single SNP association analyses we performed are shown in Supplementary Figure 1, available at Carcinogenesis Online. As is common for SKAT analyses of binary traits, there was inflation in the gene-based tests (47,48).

The number of gene-based tests conducted and the resulting alpha levels for significance are listed in Table 2 by outcome and SNP group. As the SNP functional group became more strict, fewer tests were conducted because fewer genes contained at least two SNPs in the given group. Fewer gene-based tests were conducted for the ER+ and ER- analyses compared to overall breast cancer because these subtype analyses had smaller sample sizes, which resulted in more monomorphic SNPs that were excluded.

Table 3 shows the five most significant genes for each SKAT-O run (see Supplementary Table 2, available at Carcinogenesis Online, for the top 50 genes for each set of variants). For overall and ER+ breast cancer, RTN4RL1 was the most significant gene for both the 'NS\_all' and 'NS\_broad' SNP sets, with nominal  $P$  values ranging from  $1.8 \times 10^{-5}$  to  $1.9 \times 10^{-4}$ . These results were based on 6–10 SNPs that were used in burden tests (the SKAT-O method selected rho = 1 as optimal in these instances). For the 'NS\_strict' variants, the most significant genes for overall and ER+ breast cancer were IQCA1 ( $P = 4.6 \times 10^{-4}$ ) and FSCN3 ( $P = 2.3 \times 10^{-4}$ ), respectively. None of the top results for overall or ER+ breast cancer survived a multiple testing correction based on the number of genes evaluated.

The most significant genes for ER- breast cancer were PDE4D ( $P = 1.2 \times 10^{-6}$  using either the 'NS\_all' or 'NS\_broad' SNP sets) and FBXL22 ( $P = 8.2 \times 10^{-6}$  using the 'NS\_strict' SNP set), and these

**Table 1.** Characteristics of participants in the AMBER Consortium by study site

|                  | BWHS | CBCS | WCHS | MEC | ALL AMBER |
|------------------|------|------|------|-----|-----------|
| Controls         | 2249 | 615  | 834  | 960 | 4658      |
| Cases            | 901  | 1408 | 821  | 499 | 3629      |
| ER+              | 498  | 741  | 435  | 294 | 1968      |
| ER-              | 233  | 565  | 165  | 130 | 1093      |
| ER unknown       | 170  | 102  | 221  | 75  | 568       |
| Age at diagnosis |      |      |      |     |           |
| <40              | 47   | 204  | 85   | 0   | 336       |
| 40–49            | 262  | 459  | 215  | 9   | 945       |
| 50–59            | 302  | 381  | 292  | 108 | 1083      |
| 60–69            | 204  | 267  | 173  | 165 | 809       |
| ≥70              | 86   | 97   | 56   | 217 | 456       |

AMBER, African American Breast Cancer Epidemiology and Risk; BWHS, Black Women's Health Study; CBCS, Carolina Breast Cancer Study; ER, estrogen receptor; MEC, Multi-Ethnic Cohort; WCHS, Women's Circle of Health Study.

**Table 2.** Number of gene-based tests conducted and corresponding significance criteria

| Analysis                      | Number of genes tested | Alpha level for significance |
|-------------------------------|------------------------|------------------------------|
| Overall breast cancer         |                        |                              |
| 'NS_all' SNPs <sup>a</sup>    | 14 652                 | $3.4 \times 10^{-6}$         |
| 'NS_broad' SNPs <sup>b</sup>  | 12 515                 | $4.0 \times 10^{-6}$         |
| 'NS_strict' SNPs <sup>c</sup> | 3128                   | $1.6 \times 10^{-5}$         |
| ER+ breast cancer             |                        |                              |
| 'NS_all' SNPs                 | 14 515                 | $3.4 \times 10^{-6}$         |
| 'NS_broad' SNPs               | 12 316                 | $4.1 \times 10^{-6}$         |
| 'NS_strict' SNPs              | 2963                   | $1.7 \times 10^{-5}$         |
| ER- breast cancer             |                        |                              |
| 'NS_all' SNPs                 | 14 399                 | $3.5 \times 10^{-6}$         |
| 'NS_broad' SNPs               | 12 184                 | $4.1 \times 10^{-6}$         |
| 'NS_strict' SNPs              | 2865                   | $1.8 \times 10^{-5}$         |

<sup>a</sup>'NS\_all' SNPs: stopgain, stoploss, frameshift, missense or splicing.

<sup>b</sup>'NS\_broad' SNPs: stopgain, stoploss, frameshift, or predicted damaging by at least one of the following algorithms: SIFT, mutationTaster category [A or D], LRT, PolyPhen\_HDIV or PolyPhen\_HVAR.

<sup>c</sup>'NS\_strict' SNPs: stopgain, stoploss, frameshift or predicted damaging by all five algorithms.

survived a correction for multiple testing. The *PDE4D* and *FBXL22* results were each based on burden testing ( $\rho = 1$ ) of two SNPs with a cumulative MAF  $\sim 0.02\%$ . Details of the four SNPs contributing to these significant test results are shown in [Table 4](#). All of the contributing SNPs are nonsynonymous coding SNPs for multiple isoforms of *PDE4D* or *FBXL22*. These SNPs had good genotyping cluster properties ([Supplementary Figure 2](#), available at [Carcinogenesis Online](#)) and 100% genotyping pass rates in the present study. Each SNP had an MAF  $\sim 0.01\%$  in the AMBER analysis of ER- cases and controls, due to the presence of one rare allele in one invasive ER- case. The rare allele carriers were four independent participants (one for each SNP) with varying ages at diagnosis and percentages of AA ([Table 4](#)). All four of these women had triple-negative breast cancer (tumors negative for estrogen receptors, progesterone receptors and human epidermal growth factor receptor 2). Among all 1093 ER- cases, 599 had been classified as triple negative based on available data on all three molecular markers. The four SNPs of interest are monomorphic in AAs from the 1000 Genomes Project ([49](#)) Phase 3 and the NHLBI ESP (National Heart, Lung, and Blood Institute Exome Sequencing Project) ([50](#)). These same projects report very low allele frequencies ( $\leq 0.2\%$ ) for these SNPs in European ancestry populations ([Table 4](#)).

Sensitivity analyses were run for the *PDE4D* and *FBXL22* genes versus ER- breast cancer, excluding first-degree and second-degree relatives identified via the genotypes, as well as PCA outliers who clustered with HapMap 3 Europeans, Mexicans, or Asians. Results became more significant with these exclusions (*PDE4D*  $P = 9.9 \times 10^{-7}$ ; *FBXL22*  $P = 7.4 \times 10^{-6}$ ).

Single SNP association analyses were performed for the 58 776 SNPs with MAF  $> 0.5\%$ . The correlation among these SNPs yielded the equivalent of 50 245 independent tests ([45](#)); therefore, the threshold for significance was set at  $9.95 \times 10^{-7}$ . SNP rs8100241, a previously reported risk marker at the ER-/ triple-negative GWAS locus on chromosome 19p13.11 ([12,52–56](#)), met this study-wide threshold for ER- disease ( $P = 1.7 \times 10^{-7}$ ). The A allele at rs8100241 had a frequency of 40% in the present study and was associated with a decreased risk of ER- breast cancer (OR 0.75, 95% CI 0.68, 0.84). No other individual SNPs reached statistical significance ([Supplementary Table 3](#), available at [Carcinogenesis Online](#)), including the *LDLRAD1* SNP rs145889899

( $P = 0.17$ ), for which an association had been reported in the MEC exome chip study ([16](#)).

## Discussion

In these analyses, we observed significant associations between the *PDE4D* and *FBXL22* genes and ER- breast cancer in a relatively large sample of AA women, using gene-based testing of rare exonic variants. Two nonsynonymous coding SNPs in each of these genes were responsible for their significant associations. The minor allele at each of these four SNPs was present in one invasive ER- case each (a different case subject for each of the four SNPs). These four cases were all triple-negative breast cancers. The four SNPs of interest from these two genes were absent in the AMBER controls. This is consistent with their reported monomorphism in AA samples from the 1000 Genomes Project and the NHLBI ESP.

Although the association we report for the *PDE4D* gene is with ER- (and triple-negative) breast cancer, one of the two rare SNPs contributing to this association (rs201360779) was also seen in one invasive ER+ case. Thus, this gene may affect the risk of both ER subtypes. The two contributing *PDE4D* SNPs in our study were predicted to be damaging by mutationTaster ([42](#)), although SIFT ([41](#)) predicted that these mutations would be tolerated. The PolyPhen HDIV and HVAR models ([44](#)) predicted damaging results from rs200725508, but these algorithms predicted benign results for rs201360779 (with the exception of the HDIV prediction of 'possibly damaging' for this SNP for one *PDE4D* isoform).

The 2013 GWAS meta-analysis by Michailidou and colleagues ([1](#)) reported a breast cancer association with SNP rs1353747, which is located in an intron of *PDE4D*. In that study, the G allele at this common SNP showed weak protective associations for both ER+ and ER- disease. In this study, rs1353747 was not associated with either disease subtype.

*PDE4D* is located on chromosome 5q11.2–12.1 and encodes phosphodiesterase subtype 4D, a member of the *PDE4* family of phosphodiesterases, which multiple tumor cell types express as major regulators of cAMP degradation ([57](#)). *PDE4D* may function as a tumor-promoting factor by causing lower cAMP concentrations, which have been linked to increased survival and proliferation of cancer cells. This oncogenic role is supported by experiments showing that inhibition of *PDE4D* causes apoptosis and growth retardation in multiple types of cancer cells, including breast, but not in nonmalignant epithelial cells ([57](#)).

Lin et al. ([57](#)) reported *PDE4D* homozygous deletions in 198 of 5569 (3.6%) primary tumors from The Cancer Genome Atlas (TCGA) projects and TumorScape ([58](#)), with most being internal microdeletions. They also found microdeletions in established cancer cell lines including breast. These microdeletions were associated with increased expression of the protein, and they affected upstream conserved regions 1 (UCR1) and 2 (UCR2) of the gene. UCR1 and UCR2 inhibit *PDE4D* activity, likely by forming complexes with the *PDE4D* catalytic domain before cAMP enters the site. Lin et al. showed that a short isoform of *PDE4D* with no functional UCR1 or UCR2 promoted cancer cell growth, while a long isoform that contained both UCR1 and UCR2 did not. In the present study, the two rare missense mutations contributing to the *PDE4D* gene-level association were located upstream of UCR1 and UCR2 and were risk variants (not protective). It could be hypothesized that these variants act by inducing a change in protein structure that disrupts the interaction of the UCRs with the catalytic domain of *PDE4D*, thereby increasing protein activity.

**Table 3.** The most significant gene-based test results for each analysis

| Gene                                    | Nominal P value        | Corrected P value <sup>a</sup> | rho <sup>b</sup> | Cumulative MAF (%) | Number of SNPs included in the test |
|-----------------------------------------|------------------------|--------------------------------|------------------|--------------------|-------------------------------------|
| Overall breast cancer, 'NS_all' SNPs    |                        |                                |                  |                    |                                     |
| RTN4RL1                                 | 1.3 × 10 <sup>-4</sup> | 1                              | 1                | 4.31               | 10                                  |
| TPCN1                                   | 2.0 × 10 <sup>-4</sup> | 1                              | 0                | 0.32               | 9                                   |
| RARA                                    | 2.3 × 10 <sup>-4</sup> | 1                              | 1                | 2.42               | 2                                   |
| KIF3C                                   | 3.0 × 10 <sup>-4</sup> | 1                              | 1                | 2.62               | 6                                   |
| OBSCN                                   | 4.4 × 10 <sup>-4</sup> | 1                              | 0                | 75.88              | 146                                 |
| Overall breast cancer, 'NS_broad' SNPs  |                        |                                |                  |                    |                                     |
| RTN4RL1                                 | 1.9 × 10 <sup>-4</sup> | 1                              | 1                | 1.96               | 6                                   |
| RARA                                    | 2.3 × 10 <sup>-4</sup> | 1                              | 1                | 2.42               | 2                                   |
| GPRASP1                                 | 3.0 × 10 <sup>-4</sup> | 1                              | 0                | 5.35               | 5                                   |
| NCAPG2                                  | 3.3 × 10 <sup>-4</sup> | 1                              | 0                | 2.91               | 9                                   |
| TMEM130                                 | 3.6 × 10 <sup>-4</sup> | 1                              | 0                | 0.11               | 2                                   |
| Overall breast cancer, 'NS_strict' SNPs |                        |                                |                  |                    |                                     |
| IQCA1                                   | 4.6 × 10 <sup>-4</sup> | 1                              | 0                | 3.09               | 3                                   |
| PDE4A                                   | 1.2 × 10 <sup>-3</sup> | 1                              | 1                | 0.53               | 2                                   |
| ECT2L                                   | 2.0 × 10 <sup>-3</sup> | 1                              | 0                | 1.33               | 2                                   |
| GCKR                                    | 2.5 × 10 <sup>-3</sup> | 1                              | 1                | 0.21               | 4                                   |
| ACSF3                                   | 2.6 × 10 <sup>-3</sup> | 1                              | 1                | 0.17               | 3                                   |
| ER+ breast cancer, 'NS_all' SNPs        |                        |                                |                  |                    |                                     |
| RTN4RL1                                 | 1.8 × 10 <sup>-5</sup> | 0.25                           | 1                | 4.37               | 10                                  |
| OR2W5                                   | 7.3 × 10 <sup>-5</sup> | 1                              | 1                | 16.16              | 11                                  |
| CYSRT1                                  | 1.0 × 10 <sup>-4</sup> | 1                              | 1                | 0.23               | 2                                   |
| RNF130                                  | 1.3 × 10 <sup>-4</sup> | 1                              | 0                | 0.69               | 3                                   |
| GABPA                                   | 1.3 × 10 <sup>-4</sup> | 1                              | 1                | 0.02               | 2                                   |
| ER+ breast cancer, 'NS_broad' SNPs      |                        |                                |                  |                    |                                     |
| RTN4RL1                                 | 3.2 × 10 <sup>-5</sup> | 0.39                           | 1                | 2.00               | 6                                   |
| RNF130                                  | 1.3 × 10 <sup>-4</sup> | 1                              | 0                | 0.69               | 3                                   |
| GABPA                                   | 1.3 × 10 <sup>-4</sup> | 1                              | 1                | 0.02               | 2                                   |
| OR5H15                                  | 3.5 × 10 <sup>-4</sup> | 1                              | 1                | 0.05               | 2                                   |
| TCHP                                    | 3.9 × 10 <sup>-4</sup> | 1                              | 1                | 4.35               | 11                                  |
| ER+ breast cancer, 'NS_strict' SNPs     |                        |                                |                  |                    |                                     |
| FSCN3                                   | 2.3 × 10 <sup>-4</sup> | 0.67                           | 1                | 0.06               | 3                                   |
| GUF1                                    | 7.0 × 10 <sup>-4</sup> | 1                              | 0                | 0.22               | 3                                   |
| ZIM3                                    | 7.8 × 10 <sup>-4</sup> | 1                              | 1                | 0.87               | 2                                   |
| TSC2                                    | 8.0 × 10 <sup>-4</sup> | 1                              | 0                | 0.61               | 5                                   |
| TBPL2                                   | 9.1 × 10 <sup>-4</sup> | 1                              | 0                | 0.09               | 2                                   |
| ER- breast cancer, 'NS_all' SNPs        |                        |                                |                  |                    |                                     |
| PDE4D                                   | 1.2 × 10 <sup>-6</sup> | 0.017                          | 1                | 0.02               | 2                                   |
| PLEKHG5                                 | 2.2 × 10 <sup>-5</sup> | 0.31                           | 1                | 9.36               | 18                                  |
| CCNDBP1                                 | 4.4 × 10 <sup>-5</sup> | 0.64                           | 0                | 0.06               | 3                                   |
| DIMT1                                   | 5.8 × 10 <sup>-5</sup> | 0.84                           | 0                | 0.03               | 2                                   |
| TEX12                                   | 1.6 × 10 <sup>-4</sup> | 1                              | 0                | 0.20               | 2                                   |
| ER- breast cancer, 'NS_broad' SNPs      |                        |                                |                  |                    |                                     |
| PDE4D                                   | 1.2 × 10 <sup>-6</sup> | 0.015                          | 1                | 0.02               | 2                                   |
| LRRC8D                                  | 1.8 × 10 <sup>-5</sup> | 0.22                           | 0                | 0.26               | 3                                   |
| CCNDBP1                                 | 4.4 × 10 <sup>-5</sup> | 0.54                           | 0                | 0.06               | 3                                   |
| MRPS31                                  | 9.8 × 10 <sup>-5</sup> | 1                              | 1                | 1.12               | 2                                   |
| NCR1                                    | 1.1 × 10 <sup>-4</sup> | 1                              | 0                | 0.50               | 2                                   |
| ER- breast cancer, 'NS_strict' SNPs     |                        |                                |                  |                    |                                     |
| FBXL22                                  | 8.2 × 10 <sup>-6</sup> | 0.023                          | 1                | 0.02               | 2                                   |
| CCNDBP1                                 | 3.8 × 10 <sup>-5</sup> | 0.11                           | 0                | 0.05               | 2                                   |
| SCARB1                                  | 9.6 × 10 <sup>-5</sup> | 0.28                           | 1                | 0.02               | 2                                   |
| QRSL1                                   | 9.8 × 10 <sup>-5</sup> | 0.28                           | 0                | 0.07               | 2                                   |
| MFG8                                    | 1.1 × 10 <sup>-4</sup> | 0.31                           | 0                | 0.05               | 3                                   |

MAF, minor allele frequency. <sup>a</sup>Bonferroni correction for the number of genes tested.

<sup>b</sup>The rho parameter indicates whether the SKAT test (rho = 0) or burden test (rho = 1) gave the smallest P value.

FBXL22 has not previously been associated with breast cancer. This gene is located on chromosome 15q22.31 and encodes F-box and leucine-rich repeat protein 22. This F-box protein, a ubiquitin ligase component, has been shown to promote the

degradation of sarcomeric proteins, and is critical for maintaining cardiac contractility in vivo (59). It is unclear what biological mechanism might link FBXL22 to breast cancer development. Nevertheless, the two rare SNPs contributing to the

Table 4. SNPs contributing to significant gene-based tests for ER- breast cancer

| SNP         | rsID        | Function | Fail rate <sup>a</sup> | MAF: analysis sample (%) <sup>b</sup> | MAFs: 1000G Phase 3              | MAFs: NHLBI ESP                  | Disease status            | Study | Age at diagnosis | % African ancestry <sup>c</sup> |
|-------------|-------------|----------|------------------------|---------------------------------------|----------------------------------|----------------------------------|---------------------------|-------|------------------|---------------------------------|
|             |             |          |                        |                                       |                                  |                                  |                           |       |                  |                                 |
| Gene PDE4D  |             |          |                        |                                       |                                  |                                  |                           |       |                  |                                 |
| exm456537   | rs201360779 | Missense | 0                      | 0.01                                  | Monomorphic except in FIN (1%)   | Monomorphic in AAs; 0.05% in EAs | Invasive, ER-, PR-, HER2- | BWHS  | 45               | 68.6                            |
| exm456565   | rs200725508 | Missense | 0                      | 0.01                                  | No data                          | Monomorphic in AAs; 0.03% in EAs | Invasive, ER-, PR-, HER2- | WCHS  | 61               | 99.6                            |
| Gene FBXL22 |             |          |                        |                                       |                                  |                                  |                           |       |                  |                                 |
| exm1168070  | rs201654150 | Missense | 0                      | 0.01                                  | No data                          | Monomorphic in AAs; 0.02% in EAs | Invasive, ER-, PR-, HER2- | BWHS  | 48               | 82.6                            |
| exm1168081  | rs149590841 | Missense | 0                      | 0.01                                  | Monomorphic except in ITU (0.5%) | Monomorphic in AAs; 0.10% in EAs | Invasive, ER-, PR-, HER2- | BWHS  | 35               | 61.8                            |

AAs, African Americans; EAs, European Americans; ER-, estrogen receptor negative; 1000G, 1000 Genomes; HER2-, human epidermal growth factor receptor 2 negative; FIN, Finnish; ITU, Indian Telugu in the UK; NHLBI ESP, National Heart, Lung, and Blood Institute Exome Sequencing Project; PR-, progesterone receptor negative.

<sup>a</sup>Genotyping fail rate in this study.

<sup>b</sup>Minor allele frequency in the AMBER analytic sample of ER- cases and controls. All four SNPs have an MAF <0.01%, which corresponds to the presence of one rare allele in one subject.

<sup>c</sup>Percent African versus European ancestry as estimated by ADMIXMAP (51) using 2624 AIMs (ancestry informative markers).

FBXL22/ER- association in this study met strict criteria for variant functionality: these nonsynonymous SNPs were predicted to be damaging by five different algorithms (41–44).

Single SNP analyses confirmed an ER- association for the GWAS locus on chromosome 19p13.11 (12,52–56). The associated SNP in the present study was the common missense variant rs8100241 in the ANKLE1 gene. This SNP has shown significant associations with overall (52), ER- (55) and triple-negative (53) breast cancer in prior studies of mostly European ancestry subjects. These studies reported odds ratios ranging from 0.84 to 0.88 for the A allele at this SNP, as compared with the odds ratio of 0.75 reported in the present analysis for ER- breast cancer. It should be noted, however, that the large GAME-ON meta-analysis (<http://gameon.dfci.harvard.edu>) reported weaker effect estimates for rs8100241: the odds ratio reported for overall breast cancer was 0.95 (95% CI 0.92, 0.99;  $P = 0.017$ ), and the odds ratio for ER- breast cancer was 0.94 (95% CI 0.83, 1.07;  $P = 0.36$ ).

Although the present study sample is the largest exome wide analysis sample to date for AA breast cancer, this analysis was underpowered to detect per-allele odds ratios <1.5, except when cumulative risk allele frequencies per gene approached or exceeded 5%. Further power limitations existed for analyses by ER status.

The significant gene-level findings reported here are based on four SNP variants that appear only once each in the AMBER sample of ER- cases and controls. Given these very small counts and the inflation seen in the gene-based test statistics, our results should be interpreted with caution. A simple Fisher's exact test for the presence of a rare allele in PDE4D versus ER- case/control status yields a  $P$ -value of 0.036, as does the same test for FBXL22. Fisher's exact test is conservative and does not upweight rarer variants or account for covariates; however, the modest  $P$  value from this test emphasizes the need for replication to verify associations between these genes and ER- breast cancer.

This is not to say that the rare variant calls for the four SNPs of interest are questionable. There is good reason to believe that these calls were accurate in our study. These SNPs are known rare variants that the exome chip was designed to capture. Each SNP was seen in two or more studies that contributed sequence data for development of the exome chip: the minor allele at rs201360779 was seen 29 times across the ~12 000 sequenced individuals, the minor allele at rs149590841 was seen seven times, and the minor alleles for the other two SNPs were each seen three times (<ftp://share.sph.umich.edu/exomeChip/ProposedContent/codingContent/>). In AMBER, all four SNPs showed high quality genotype clusters and clear separation of the heterozygous calls from the remainder of the genotypes. In addition, SNP rs201360779 was not a true singleton in AMBER, having also been seen in one ER+ case.

The exome chip used here has inherent limitations. First and most obvious, this array-based method includes only selected rare variants and is therefore not as exhaustive as exome sequencing in capturing rare exonic variants. Second, this chip does not attempt to assay rare variation in noncoding regions. Third, the chip was designed using exome sequencing data from mostly European samples. Therefore, rare variants in non-Europeans are not as well captured, and our data set may have lacked information on some important rare SNPs in AA populations (22).

Another potential limitation of our study is a current limitation of the field: the use of traditional methods such as PCA (or linear mixed models) to adjust for population stratification

in rare variant association studies. These methods may not adequately control for population structure in some rare variant analysis settings; thus, the development of new methods for this purpose is an area of active research (23).

We should also acknowledge that while our multiple testing correction adjusted for the number of genes analyzed, there were additional levels of testing that were not included in this correction. Multiple outcomes (overall, ER+, ER– breast cancer) and SNP functional groups (NS\_all, NS\_broad, NS\_strict) were also analyzed. We did not correct for the multiple breast cancer outcomes because there was considerable overlap among the groups of patients analyzed for overall, ER+ and ER– breast cancer, and we considered these to be tests of related hypotheses. There was also a high amount of interdependence among the three SNP functional groups, which would render a Bonferroni correction overly conservative. Nevertheless, implementing an adjustment for all of the ER– gene-based tests conducted across the three SNP functional groups results in a corrected *P* value of 0.035 for *PDE4D*, although the corrected *P* value for *FBXL22* becomes non-significant (0.240).

In summary, an exome-wide gene-based analysis of rare variants found significant associations between the *PDE4D* and *FBXL22* genes and ER– breast cancer in a collaborative study of AA women. The previous GWAS finding of a breast cancer risk marker in the *PDE4D* gene supports the idea that rare variants in this region in particular might affect breast cancer risk. Replication is needed to confirm the gene-level associations reported here, which are based on very small counts at extremely rare variants.

## Supplementary material

Supplementary Tables 1–3 and Figures 1 and 2 can be found at <http://carcin.oxfordjournals.org/>.

## Funding

This work was supported by the National Institutes of Health (P01 CA151135 to C.B.A., J.R.P., and A.F.O., R01 CA058420 to L.R., UM1 CA164974 to L.R. and J.R.P., R01 CA098663 to J.R.P., R01 CA100598 to C.B.A., UM1 CA164973 to L.L.M., L.K.M., and C.A.H., R01 CA54281 to L.N.K., R01 CA063464 to B.H., P50 CA58223 to M.A.T. and A.F.O., U01 CA179715 to M.A.T. and A.F.O.); the Department of Defense Breast Cancer Research Program, Era of Hope Scholar Award Program (W81XWH-08-1-0383 to C.A.H.); the Susan G. Komen for the Cure Foundation (to M.A.T. and A.F.O.); the Breast Cancer Research Foundation (to C.B.A.); and the University Cancer Research Fund of North Carolina (to M.A.T. and A.F.O.).

## Acknowledgements

Pathology data were obtained from numerous state cancer registries (Arizona, California, Colorado, Connecticut, Delaware, District of Columbia, Florida, Georgia, Hawaii, Illinois, Indiana, Kentucky, Louisiana, Maryland, Massachusetts, Michigan, New Jersey, New York, North Carolina, Oklahoma, Pennsylvania, South Carolina, Tennessee, Texas, Virginia). The results reported do not necessarily represent their views or the views of the NIH.

*Conflict of Interest Statement:* None declared.

## References

- Michailidou, K. et al. (2013) Large-scale genotyping identifies 41 new loci associated with breast cancer risk. *Nat. Genet.*, 45, 353–361.
- Michailidou, K. et al. (2015) Genome-wide association analysis of more than 120,000 individuals identifies 15 new susceptibility loci for breast cancer. *Nat. Genet.*, 47, 373–380.
- Lalloo, F. et al. (2012) Familial breast cancer. *Clin. Genet.*, 82, 105–114.
- Njijsu, U.O. et al. (2012) Genetic determinants of breast cancer risk: a review of current literature and issues pertaining to clinical application: genetic determinants of breast cancer risk. *Breast J.*, 18, 436–442.
- Zheng, W. et al. (2009) Evaluation of 11 breast cancer susceptibility loci in African-American women. *Cancer Epidemiol. Biomarkers Prev.*, 18, 2761–2764.
- Ruiz-Narváez, E.A. et al. (2010) Polymorphisms in the *TOX3/LOC643714* locus and risk of breast cancer in African-American women. *Cancer Epidemiol. Biomarkers Prev.*, 19, 1320–1327.
- Barnholtz-Sloan, J.S. et al. (2010) *FGFR2* and other loci identified in genome-wide association studies are associated with breast cancer in African-American and younger women. *Carcinogenesis*, 31, 1417–1423.
- Hutter, C.M. et al. (2011) Replication of breast cancer GWAS susceptibility loci in the Women's Health Initiative African American SHARE Study. *Cancer Epidemiol. Biomarkers Prev.*, 20, 1950–1959.
- Chen, F. et al. (2011) Fine-mapping of breast cancer susceptibility loci characterizes genetic risk in African Americans. *Hum. Mol. Genet.*, 20, 4491–4503.
- Zheng, Y. et al. (2012) Lack of association between common single nucleotide polymorphisms in the *TERT-CLPTM1L* locus and breast cancer in women of African ancestry. *Breast Cancer Res. Treat.*, 132, 341–345.
- Huo, D. et al. (2012) Evaluation of 19 susceptibility loci of breast cancer in women of African ancestry. *Carcinogenesis*, 33, 835–840.
- Palmer, J.R. et al. (2013) Genetic susceptibility loci for subtypes of breast cancer in an African American population. *Cancer Epidemiol. Biomarkers Prev.*, 22, 127–134.
- Zheng, Y. et al. (2013) Fine mapping of breast cancer genome-wide association studies loci in women of African ancestry identifies novel susceptibility markers. *Carcinogenesis*, 34, 1520–1528.
- Long, J. et al. (2013) Evaluating genome-wide association study-identified breast cancer risk variants in African-American women. *PLoS One*, 8, e58350.
- O'Brien, K.M. et al. (2014) Replication of breast cancer susceptibility loci in whites and African Americans using a Bayesian approach. *Am. J. Epidemiol.*, 179, 382–394.
- Haiman, C.A. et al. (2013) Genome-wide testing of putative functional exonic variants in relationship with breast and prostate cancer risk in a multiethnic population. *PLoS Genet.*, 9, e1003419.
- Panoutsopoulou, K. et al. (2013) In search of low-frequency and rare variants affecting complex traits. *Hum. Mol. Genet.*, 22, R16–R21.
- Apostolou, P. et al. (2013) Hereditary Breast Cancer: The Era of New Susceptibility Genes. *BioMed Res. Int.*, 2013, 1–11.
- Gudmundsson, J. et al. (2012) A study based on whole-genome sequencing yields a rare variant at 8q24 associated with prostate cancer. *Nat. Genet.*, 44, 1326–1329.
- Loveday, C. et al. (2011) Germline mutations in *RAD51D* confer susceptibility to ovarian cancer. *Nat. Genet.*, 43, 879–882.
- Rafnar, T. et al. (2011) Mutations in *BRIP1* confer high risk of ovarian cancer. *Nat. Genet.*, 43, 1104–1107.
- Lee, S. et al. (2014) Rare-variant association analysis: study designs and statistical tests. *Am. J. Hum. Genet.*, 95, 5–23.
- Auer, P.L. et al. (2015) Rare variant association studies: considerations, challenges and opportunities. *Genome Med.*, 7, 16.
- Palmer, J.R. et al. (2014) A collaborative study of the etiology of breast cancer subtypes in African American women: the AMBER consortium. *Cancer Causes Control*, 25, 309–319.
- Newman, B. et al. (1995) The Carolina Breast Cancer Study: integrating population-based epidemiology and molecular biology. *Breast Cancer Res. Treat.*, 35, 51–60.
- Ambrosone, C.B. et al. (2009) Conducting molecular epidemiological research in the age of HIPAA: a multi-institutional case-control study of breast cancer in African-American and European-American Women. *J. Oncol.*, 2009, 871250.
- Bandera, E.V. et al. (2013) Rethinking sources of representative controls for the conduct of case-control studies in minority populations. *BMC Med. Res. Methodol.*, 13, 71.

28. Rosenberg, L. et al. (1995) The Black Women's Health Study: a follow-up study for causes and preventions of illness. *J. Am. Med. Womens. Assoc.*, 50, 56–58.
29. Kolonel, L.N. et al. (2000) A multiethnic cohort in Hawaii and Los Angeles: baseline characteristics. *Am. J. Epidemiol.*, 151, 346–357.
30. Goldstein, J.I. et al. (2012) zCall: a rare variant caller for array-based genotyping: Genetics and population analysis. *Bioinformatics*, 28, 2543–2545.
31. The International HapMap Consortium (2005) A haplotype map of the human genome. *Nature*, 437, 1299–1320.
32. Grove, M.L. et al. (2013) Best practices and joint calling of the HumanExome BeadChip: the CHARGE Consortium. *PLoS One*, 8, e68095.
33. Liu, X. et al. (2011) dbNSFP: a lightweight database of human nonsynonymous SNPs and their functional predictions. *Hum. Mutat.*, 32, 894–899.
34. Liu, X. et al. (2013) dbNSFP v2.0: a database of human non-synonymous SNVs and their functional predictions and annotations. *Hum. Mutat.*, 34, E2393–E2402.
35. Patterson, N. et al. (2006) Population structure and eigencanalysis. *PLoS Genet.*, 2, e190.
36. Purcell, S. et al. (2007) PLINK: a tool set for whole-genome association and population-based linkage analyses. *Am. J. Hum. Genet.*, 81, 559–575.
37. Lee, S. et al. (2012) Optimal unified approach for rare-variant association testing with application to small-sample case-control whole-exome sequencing studies. *Am. J. Hum. Genet.*, 91, 224–237.
38. Voorman, A. et al. (2012) seqMeta: an R package for meta-analyzing region-based tests of rare DNA variants. <https://cran.r-project.org/web/packages/seqMeta/index.html>
39. Wu, M.C. et al. (2011) Rare-variant association testing for sequencing data with the sequence kernel association test. *Am. J. Hum. Genet.*, 89, 82–93.
40. Purcell, S.M. et al. (2014) A polygenic burden of rare disruptive mutations in schizophrenia. *Nature*, 506, 185–190.
41. Kumar, P. et al. (2009) Predicting the effects of coding non-synonymous variants on protein function using the SIFT algorithm. *Nat. Protoc.*, 4, 1073–1081.
42. Schwarz, J.M. et al. (2010) MutationTaster evaluates disease-causing potential of sequence alterations. *Nat. Methods*, 7, 575–576.
43. Chun, S. et al. (2009) Identification of deleterious mutations within three human genomes. *Genome Res.*, 19, 1553–1561.
44. Adzhubei, I.A. et al. (2010) A method and server for predicting damaging missense mutations. *Nat. Methods*, 7, 248–249.
45. Gao, X. et al. (2008) A multiple testing correction method for genetic association studies using correlated single nucleotide polymorphisms. *Genet. Epidemiol.*, 32, 361–369.
46. Liu, L. et al. (2013) Analysis of rare, exonic variation amongst subjects with autism spectrum disorders and population controls. *PLoS Genet.*, 9, e1003443.
47. Ma, C. et al. (2013) Recommended joint and meta-analysis strategies for case-control association testing of single low-count variants: joint and meta-analysis of low-count variants. *Genet. Epidemiol.*, 37, 539–550.
48. Lee, S. et al. (2015) An efficient resampling method for calibrating single and gene-based rare variant association analysis in case-control studies. *Biostatistics*. doi:10.1093/biostatistics/kxv033.
49. McVean, G.A. et al. (2012) An integrated map of genetic variation from 1,092 human genomes. *Nature*, 491, 56–65.
50. Exome Variant Server. NHLBI GO Exome Sequencing Project (ESP).
51. McKeigue, P.M. et al. (2000) Estimation of admixture and detection of linkage in admixed populations by a Bayesian approach: application to African-American populations. *Ann. Hum. Genet.*, 64, 171–186.
52. Antoniou, A.C. et al. (2010) A locus on 19p13 modifies risk of breast cancer in BRCA1 mutation carriers and is associated with hormone receptor-negative breast cancer in the general population. *Nat. Genet.*, 42, 885–892.
53. Stevens, K.N. et al. (2011) Common breast cancer susceptibility loci are associated with triple-negative breast cancer. *Cancer Res.*, 71, 6240–6249.
54. Stevens, K.N. et al. (2012) 19p13.1 is a triple-negative-specific breast cancer susceptibility locus. *Cancer Res.*, 72, 1795–1803.
55. Siddiq, A. et al. (2012) A meta-analysis of genome-wide association studies of breast cancer identifies two novel susceptibility loci at 6q14 and 20q11. *Hum. Mol. Genet.*, 21, 5373–5384.
56. Garcia-Closas, M. et al. (2013) Genome-wide association studies identify four ER negative-specific breast cancer risk loci. *Nat. Genet.*, 45, 392–398.
57. Lin, D.C. et al. (2013) Genomic and functional characterizations of phosphodiesterase subtype 4D in human cancers. *Proc. Natl. Acad. Sci. USA*, 110, 6109–6114.
58. Beroukhi, R. et al. (2010) The landscape of somatic copy-number alteration across human cancers. *Nature*, 463, 899–905.
59. Spaich, S. et al. (2012) F-box and leucine-rich repeat protein 22 is a cardiac-enriched F-box protein that regulates sarcomeric protein turnover and is essential for maintenance of contractile function in vivo. *Circ. Res.*, 111, 1504–1516.
